# Supplementary material for: S100A7 promotes the migration, invasion and metastasis of human cervical cancer cells through epithelial–mesenchymal transition
Source: PubMed Central journal article supplement (PMC5421902; doi:10.18632/oncotarget.15329), 2017-02-15
Supplement: oncotarget-08-24964-s001.pdf [file oncotarget-08-24964-s001.pdf]

# S100A7 promotes the migration, invasion and metastasis of human cervical cancer cells through epithelial–mesenchymal transition

## SUPPLEMENTARY FIGURE

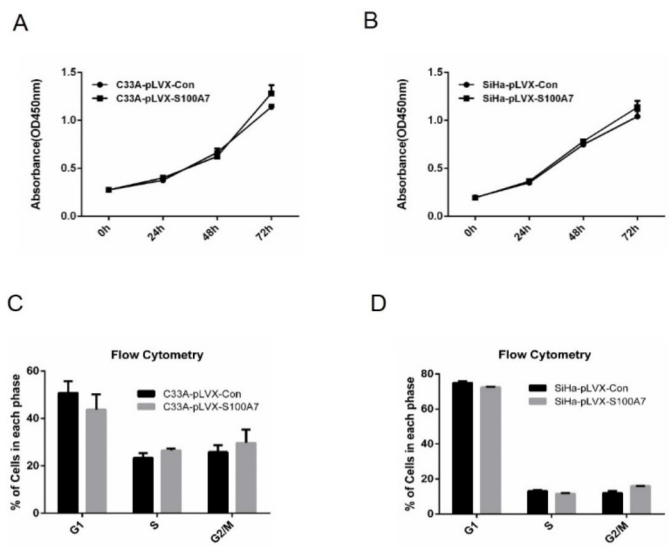

**Supplementary Figure 1: S100A7 has no impact on cell proliferation and cell cycle progression of cervical cancer cells.** Cell proliferation was determined by CCK-8 assay in C33A **A.** and SiHa **B.** cells. Cell-cycle distribution was analyzed by FACS in C33A **C.** and SiHa **D.** cells.
